# Supplementary material for: Food Sources of Animal Protein in Relation to Overall and Cause-Specific Mortality—Causal Associations or Confounding? An Analysis of the EPIC-Heidelberg Cohort
Source: MDPI journal article supplement (doi:10.3390/nu15153322), 2023-07-26
Supplement: s1 [file s1]

**Supplementary Table S1: Food items included in each food group**

| Food Group     | Food Items                                                                                                                  |
|----------------|-----------------------------------------------------------------------------------------------------------------------------|
| Red meat       | Beef, veal, pork, mutton/lamb, horse, goat                                                                                  |
| Processed meat | Bacon, liver containing items, ham, hamburger, meatballs, minced meat, other processed meat (example: sausage, canned meat) |
| Poultry        | Chicken, turkey, duck, goose, rabbit                                                                                        |
| Cheese         | Ricotta, other cheeses (example: cheddar, gouda, camembert, mozzarella)                                                     |
| Milk           | Whole milk, semi-skimmed milk, skimmed milk, non-specified milk, fermented milk                                             |

**Supplementary Table S2: Types of cancer categories**

|                                                     | Cancer Sites                             | ICD-10 Codes                                                                                                                                |
|-----------------------------------------------------|------------------------------------------|---------------------------------------------------------------------------------------------------------------------------------------------|
| Strongly smoking-related cancer deaths              | Oral cavity and pharynx                  | C001, C01, C021, C023, C030, C031, C040, C048, C049, C051, C069, C07, C080, C089, C098, C099, C102, C103, C108, C109, C12, C132, C138, C148 |
|                                                     | esophagus                                | C150, C153, C154, C155, C158, C159, C14, C15                                                                                                |
|                                                     | larynx                                   | C320, C321, C322, C328, C329                                                                                                                |
|                                                     | Trachea, lung, bronchus                  | C33, C340, C3402, C341, C342, C343, C348, C349                                                                                              |
|                                                     | nose, nasal cavity, and middle ear       | C300, C301, C310, C311, C319                                                                                                                |
|                                                     | mediastinum and other respiratory organs | C383                                                                                                                                        |
| Strongly alcohol- and smoking related cancer deaths | Oral cavity and pharynx                  | C001, C01, C021, C023, C030, C031, C040, C048, C049, C051, C069, C07, C080, C089, C098, C099, C102, C103, C108, C109, C12, C132, C138, C148 |
|                                                     | esophagus                                | C150, C153, C154, C155, C158, C159, C14, C15                                                                                                |
|                                                     | larynx                                   | C320, C321, C322, C328, C329                                                                                                                |

**Supplementary Table S3: Coefficient of determination ( $R^2$ )<sup>a</sup> showing the proportion of variance in food sources of animal protein intake that can be explained by lifestyle variables.**

|                        | Smoking Status ( $R^2$ ) | Measures of Adiposity <sup>b</sup> ( $R^2$ ) | Alcohol Intake ( $R^2$ ) | Physical Activity ( $R^2$ ) | Smoking Status, MEASURES of adiposity, Alcohol Intake, and Physical Activity ( $R^2$ ) | Smoking Status, Measures of ADIPOSITY, alcohol Intake, Physical Activity, and Education ( $R^2$ ) |
|------------------------|--------------------------|----------------------------------------------|--------------------------|-----------------------------|----------------------------------------------------------------------------------------|---------------------------------------------------------------------------------------------------|
| Red meat (g/day)       | 0.17                     | 0.19                                         | 0.17                     | 0.18                        | 0.21                                                                                   | 0.21                                                                                              |
| Processed meat (g/day) | 0.25                     | 0.28                                         | 0.25                     | 0.25                        | 0.28                                                                                   | 0.29                                                                                              |
| Poultry (g/day)        | 0.03                     | 0.04                                         | 0.03                     | 0.03                        | 0.04                                                                                   | 0.04                                                                                              |
| Cheese (g/day)         | 0.07                     | 0.08                                         | 0.07                     | 0.07                        | 0.08                                                                                   | 0.10                                                                                              |
| Milk (g/day)           | 0.03                     | 0.03                                         | 0.04                     | 0.03                        | 0.04                                                                                   | 0.04                                                                                              |

<sup>a</sup>  $R^2$  values were estimated using linear regression models adjusted for age, sex and total energy intake

<sup>b</sup> Measures of adiposity include measures of waist circumference and body mass index
